# Supplementary material for: Friagem Event in Central Amazon and its Influence on Micrometeorological Variables and Atmospheric Chemistry
Source: Copernicus journal article supplement (doi:10.5194/acp-2020-564), 2020-07-14
Supplement: Supplementary file [file acp-2020-564-AC1-supplement.pdf]

1 **Interactive comment on “Friagem Event in Central Amazon and**  
2 **its Influence on Micrometeorological Variables and Atmospheric**  
3 **Chemistry” byGuilherme F. Camarinha-Neto et al.**

4  
5 **Anonymous Referee #1**

6  
7 **We would like to thank all the reviewer's comments. Our answers are in blue**  
8 **font and part of them were added to the manuscript.**

9  
10 **Question**

11 **General comments:** The manuscript presents an interesting discussion of how  
12 the entry of a cold front or cold can interfere with micrometeorological conditions  
13 and the rates of trace gas mixture in central Amazonia. The combination of  
14 surface measurements with the simulations of the coupled model JULES-  
15 CCATT-BRAMS made it possible to understand the cooling effects, as well as  
16 their development and implications. Certainly, the results related to the effects on  
17 Lake Balbina are important for understanding the effects of cold on the ecosystem  
18 as a whole. In general, the work has an importante scientific contribution, as it  
19 clearly and objectively shows the ecosystem’s response to a cold event. With  
20 regard to the structure of the manuscript, it still needs adjustments in the text.  
21 Some structural modifications are needed to make it clearer to the reader around  
22 the methodological application used to achieve the proposed objectives. **(1)** The  
23 only point to be reviewed more intensively is the choice of the study period and  
24 the implications of this in the discussions. As the methodology of the work itself  
25 shows, this manuscript brings as results the case study of a particular event that  
26 occurred from July 6 to 11, 2014, however, no discussion about the  
27 meteorological characteristics of this year was held, it was also not clear whether  
28 any cold front arrival in the region will cause the same effects. The authors cite  
29 other studies on coldness in the Amazon, which are in agreement with their  
30 results, but do not make clear when these analyses were performed. **(2)** As much  
31 of the results are derived from simulations it would be interesting to discuss the  
32 possible annual variations or at least discuss whether such variations may exist  
33 or not, as well as answer whether the effects on atmospheric chemistry will

34 always be these, or if by different conditions, such as a year with high burn rates,  
35 these results may diverge, that is, my suggestion is a small restructuring of the  
36 results to include these discussions.

37

38 **Answer**

39 We appreciate the reviewer's comments. We will respond in parts:

40 **(1):** The reasons for choosing the case study shown in the manuscript (July 6 to  
41 11, 2014), were as follows: i) July is one of the months with the largest number  
42 of cold fronts that arrive in the South-Southeastern region of Brazil (Prince and  
43 Evans, 2018). Consequently, July is also the month where a greater number of  
44 Friagem phenomena are observed in the Amazon region (Prince and Evans,  
45 2018). ii) Throughout 2014, intensive activities of the GoAmazon project took  
46 place (Martin et al., 2016), that is, measurements of gases and the  
47 thermodynamics of the atmosphere were carried out in several sites investigated  
48 in this work (T2, T3 and T0z), and therefore this was the motivation for choosing  
49 the year 2014 for our case study. iii) The period between 06 and 11 July was  
50 chosen, as it was observed that a Friagem event reached the city of Manaus and  
51 its surroundings in those days. It should be noted that for a Friagem event to  
52 occur, it is necessary that a mass of cold air (cold front), coming from the South  
53 reaches the North region of Brazil. Friagem events do not always have the  
54 “capacity” to reach the city of Manaus. For example, on July 25-31 2014 there  
55 was also a Friagem event in the Southwest of the Amazon, but this event was  
56 not observed in the city of Manaus.

57 About the meteorological characteristics of this year, according to the  
58 CLIMANALISE Bulletin  
59 (<http://climanalise.cptec.inpe.br/~rclimanl/boletim/pdf/pdf14/jul14.pdf>), in July  
60 2014, precipitation in northern Brazil showed positive and negative deviations  
61 from the climatological average (Figure 1a). In addition, the deviation from the  
62 maximum temperature in relation to its climatology shows a drop in the maximum  
63 temperature from the state of São Paulo to the Southwest of the Amazon,  
64 indicating the advance of frontal systems in this region (Figure 1b).

65           Regarding global scale phenomena, the South Oscillation Index showed  
66 that this month remained close to neutral, that is, without the occurrence of the  
67 El Nino and La Nina phenomena.

68           The main characteristics of the Friagem observed in this work seem very  
69 similar to those observed by Marengo et al. (1997) and Silva-Dias et al. (2004),  
70 both cited in the manuscript.

71           Marengo et al. (1997) investigated the two strongest Friagem events that  
72 occurred during the year 1994, being: June 26th and July 10th. For both events  
73 they observed that the main consequence of the Friagem in the City of Manaus  
74 was greater cloud cover and consequently less solar radiation reaching the  
75 surface, which is the main cause of the fall in air temperature. In addition, they  
76 noted that Friagens produced a shallower boundary layer. That is, the results by  
77 Marengo et al. (1997) corroborate part of our results - Friagem increases the  
78 cloud cover (Fig. 4), reduces the air temperature (Fig. 6) and produces a  
79 shallower boundary layer (Fig. 11a).

80           The work by Silva-Dias et al. (2004) showed that during the period from 24  
81 to 31 July 2001, the arrival of a cold air mass in the western region of the Amazon  
82 increased atmospheric pressure to sea level in this region, resulting in a pressure  
83 gradient force pointing in the opposite direction of the trade winds, which is  
84 consistent with a deceleration of the trade winds and the consequent formation  
85 of more intense breeze circulations in the Santarém region. The main  
86 consequences of this Friagem in the city of Manaus were: drop in air temperature  
87 around 5 °C, reduction in wind speed, confluence of a cold and dry air mass  
88 coming from the South region with a hot and humid air mass coming eastern  
89 Amazon. We emphasize that part of our results are corroborated by Silva-Dias et  
90 al. (2004), which are: (1) confluence of trade winds with westerly winds in central  
91 Amazonia (Fig. 3). We show that it was this confluence that was mainly  
92 responsible for the formation of clouds and the consequent reduction of solar  
93 radiation that reached surfaces, reducing the air temperature and the O<sub>3</sub>  
94 concentration.

95

96

**(a) Deviation of precipitation in July 2014**

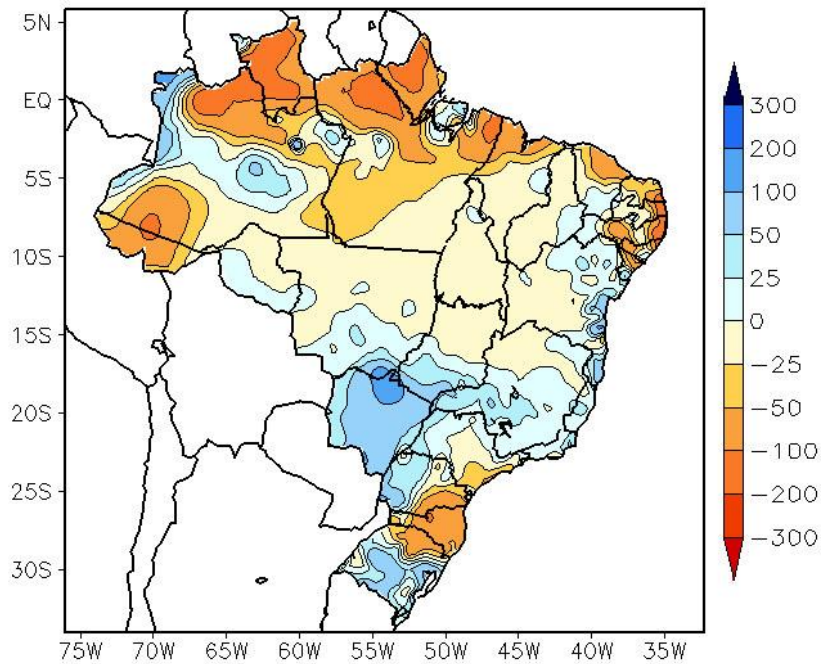

**(b) Maximum temperature deviation (°C) in July 2014**

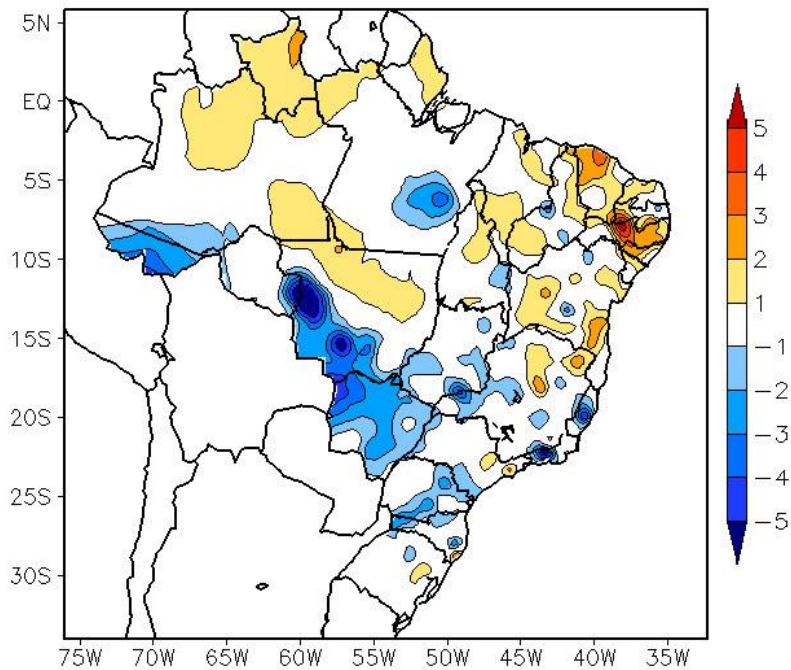

97 Figure 1. Behavior (a) deviation of accumulated precipitation in relation to climatological-  
98 mean (1961-1990) and (b) deviation from maximum temperature in relation to  
99 climatological-mean (1961-1990) for July 2014.

100 Source: Monitoring and Climate Analysis Bulletin (CLIMANASE). V. 29, No.07, July  
101 2014. ISSN 0103-0019 CDU-555.5

102

103 **(2):** We agree with the reviewer that new simulations that show the impact of  
104 possible annual variations, such as the increase/decrease in precipitation and air  
105 humidity and decrease/increase in temperature, during atypical years, such as  
106 La Niña / El niño, among others, can influence the number of occurrences and  
107 the strength of Friagem events and, consequently, the chemistry and  
108 thermodynamics of the atmosphere near the surface. In addition, the  
109 performance of simulations with different burn rates conditions and consequently  
110 with different amounts of cloud condensation nuclei can influence the formation  
111 of clouds and the role of cooling above the central Amazon. However, the  
112 objective of this work is not to make comparisons between different annual  
113 conditions, but to demean a case study. The reviewer's suggestions are valuable  
114 and will be the subject of future research by this group. In addition, we will add  
115 these suggestions to the conclusions of the manuscript (suggestions for future  
116 work).

117

118 **Question**

119 **Specific comments:** About the abstract: Review the first sentence of the  
120 abstract, because it practically already brings, in a more generic way, the main  
121 conclusion of the work, that is, the authors begin the work stating that the cold  
122 event influences the variables and atmospheric chemistry. I suggest changing the  
123 sentence and leaving to make this statement at the end of the abstract along with  
124 the main conclusions of the work.

125

126 **Answer**

127 We decided to move this sentence from the abstract to the conclusions section.

128

129 **Question**

130 About the introduction: In paragraph 30, the authors evidence the influence of  
131 breezes on CO<sub>2</sub> and O<sub>3</sub> mixing rates, however, they mention a region of North  
132 America, Canada, and this is out of context in the manuscript because all other  
133 information collected in the introduction directly mentions works developed in the  
134 Amazon. If the authors want to talk more about these events around the world,  
135 they should include supplementary discussions on the effects of lake breezes.

136 The last sentence of paragraph 50 is a text that describes how the objectives will  
137 be achieved, that is, a text of methodology, I suggest removing or restructuring  
138 this text since this information will appear in the methodology.

139

140 **Answer**

141 We agree with the reviewer: We rewrite the paragraph 30 and we remove the last  
142 sentence of paragraph 50 that described how the objectives will be achieved.

143

144 **Question**

145 About the methodology: In paragraph 70 the authors say that this is a case study,  
146 it would be interesting at this moment to talk about the specific implications of this  
147 analyzed period.

148

149 **Answer**

150 We introduced a new paragraph to better explain the motivation for choosing July  
151 2014 as case study and we made a brief comment about the specific implications  
152 of this analyzed period (L68-75).

153

154 **Question**

155 When talking about the O<sub>3</sub> measurements in the analyzed sites, it is observed  
156 that these measurements were performed at different heights, ATTO at 79m, T3  
157 at 3.5m, T2 at 12m and T0z at 39m. Can these different heights interfere with the  
158 measurements? The authors can make a brief discussion about this.

159

160 **Answer**

161 Yes, different measurement heights may affect the observed O<sub>3</sub> concentrations  
162 in some cases, due to the process of dry deposition onto available surfaces and  
163 stomatal uptake by vegetation. In the case of T2 and T3 sites, which are not forest  
164 sites, the measurement height may not have a significant influence on O<sub>3</sub>  
165 concentrations during the day in a well mixed boundary layer, provided that the  
166 inlets were set apart from surfaces like walls, roofs and trees. At forest sites,  
167 previous studies have shown a significant O<sub>3</sub> vertical gradient inside the canopy,  
168 especially in its lowest half part (e.g., Rummel et al., 2007; Freire et al., 2017).  
169 However, the reported O<sub>3</sub> measurements at T0z and ATTO were taken above

170 the canopy, where vertical gradients are expected to be close to zero if the  
171 boundary layer is well mixed. Based on previous studies, we estimate that the 40  
172 m difference in the measurement height of ATTO and T0z may result in a 15%  
173 difference on O<sub>3</sub> concentrations, with smaller concentrations at T0z due to the  
174 proximity of the canopy top. Nevertheless, this difference does not affect the main  
175 aspect discussed in Figure 11, which clearly shows a decrease in diurnal O<sub>3</sub>  
176 concentrations at all sites in 2014 July 11th as a result of the influence of a cold  
177 front.

178 We put part of this comment in the main text of the manuscript (L95-101).

179

#### 180 **Question**

181 On the results: the results are presented in a very clear and objective way, the  
182 only observation is made in relation to the period of analysis. As described in the  
183 methodology of the work, this manuscript brings as results the case study of a  
184 particular event that occurred from July 6 to 11, 2014, however, no discussion  
185 about the meteorological characteristics of this year was held, it was also not  
186 clear whether any cold front arrival in the region will cause the same effects. The  
187 authors cite other studies on coldness on Amazon, which are in agreement with  
188 their results, but do not make clear when these analyses were performed.

189

#### 190 **Answer**

191 We inserted new paragraphs in the manuscript that make the meteorological  
192 characteristics of this year (L68-75) and in our citations about other studies on  
193 coldness on Amazon we make more clear when these analyzes were performed  
194 (L181-184; L214-218)

195

#### 196 **Question**

197 As much of the results are derived from simulations it would be interesting to  
198 discuss the possible annual variations or at least discuss whether such variations  
199 may exist or not, as well as answer whether the effects on atmospheric chemistry  
200 will always be these, or if by different conditions, such as a year with high burn  
201 rates, these results may be different, that is, I suggest a small restructuring of the  
202 results so that these discussions are included.

203

204 **Answer**

205 We agree with the reviewer that new simulations that show the impact of possible  
206 annual variations, such as the increase/decrease in precipitation and air humidity  
207 and decrease/increase in temperature, during atypical years, such as La Niña/El  
208 niño, among others, can influence the number of occurrences and the strength of  
209 Friagem events and, consequently, the chemistry and thermodynamics of the  
210 atmosphere near the surface. In addition, the performance of simulations with  
211 different burn rates conditions and consequently with different amounts of cloud  
212 condensation nuclei can influence the formation of clouds and the role of cooling  
213 above the central Amazon. However, the objective of this work is not to make  
214 comparisons between different annual conditions, but to demean a case study.  
215 The reviewer's suggestions are valuable and will be the subject of future research  
216 by this group. In addition, we will add these suggestions to the conclusions of the  
217 manuscript (suggestions for future work).

218

219 **Question**

220 About the figures presented in the results: In general, give more detailed  
221 information of the figures in the subtitles. The figures along with their subtitles  
222 have to be highexplanatory. Another detail that the authors have to review are  
223 the titles of the axes of the figures, as well as the title in the "colobar" when  
224 necessary.

225

226 **Answer**

227 Thank you. We reviewed the figure captions and made some minor changes (in  
228 blue). In all the figures where there is "colobar" we indicate that they represents  
229 the shaded area. The axes that do not have a title are those that indicate the  
230 North/South and East/West coordinates.

231

232 **Question**

233 On the conclusion: In paragraph 320 the authors state that in general, the model  
234 satisfactorily reproduced the main changes caused by the cold phenomenon. Did  
235 the authors intend to evaluate the application of the model? Was that a goal, too?  
236 Just one observation in the last sentence of the conclusion: it is practically the



237 same initial sentence in the abstract, so is necessary to restructure this fragment  
238 in the abstract.

239

#### 240 **Answer**

241 We would like to thank the reviewer for his comments. We decided to remove the  
242 sentence "*In general, the model reproduced satisfactorily the main changes that*  
243 *the phenomenon brought to the environment of interest*" from the conclusion and  
244 the sentence "*that is, the Friagem event has the ability to significantly change the*  
245 *microclimate and atmospheric chemistry close to the surface in the Amazon*  
246 *central region*" of the abstract.

247

#### 248 **References**

249

250 Freire, L. S., Gerken, T., Ruiz-Plancarte, J., Wei, D., Fuentes, J. D., Katul, G.  
251 G., Dias, N. L., Acevedo, O. C., and Chamecki, M. Turbulent mixing and removal  
252 of ozone within an Amazon rainforest canopy, *J. Geophys. Res.*  
253 *Atmos.*, 122, 2791– 2811, doi:10.1002/2016JD026009, 2017.

254

255 Marengo, J. A., Nobre, C. A., and Culf, A. D.: Climatic impacts of “friagens” in  
256 forested and deforested areas of the Amazon basin, *J. Appl. Meteorol.*, 36, 1553–  
257 1566, [https://doi.org/10.1175/1520-0450\(1997\)036<1553:CIOFIF>2.0.CO;2](https://doi.org/10.1175/1520-0450(1997)036<1553:CIOFIF>2.0.CO;2),  
258 1997.

259

260 Martin, S. T., Artaxo, P., Machado, L. A. T., Manzi, A. O., Souza, R. A. F.,  
261 Schumacher, C., Wang, J., Andreae, M. O., Barbosa, H. M. J., Fan, J., Fisch, G.,  
262 Goldstein, A. H., Guenther, A., Jimenez, J. L., Pschl, U., Silva Dias, M., Smith, J.  
263 N., and Wendisch, M.: Introduction: Observations and Modeling of the Green  
264 Ocean Amazon (GoAmazon2014/5), *Atmos. Chem. Phys.*, 16, 4785–4797,  
265 <https://doi.org/10.5194/acp-16-4785-2016>, 2016.

266

267 Prince, K. C. and Evans, C.: A Climatology of Extreme South American Andean  
268 Cold Surges, *J. Appl. Meteorol. and Climatol.*, 57, 2297–2315,  
269 <https://doi.org/10.1175/JAMC-D-18-0146.1>, 2018.

270

271 Rummel, U., Ammann, C., Kirkman, G., Moura, M., Foken, T., Andreae, M., and  
272 Meixner, F.: Seasonal variation of ozone deposition to a tropical rain forest in  
273 southwest Amazonia, *Atmos. Chem. Phys.*, 7, 5415–5435,  
274 <https://doi.org/10.5194/acp-7-5415-2007>, 2007.

275

276 Silva Dias, M., Dias, P. S., Longo, M., Fitzjarrald, D. R., and Denning, A. S.: River  
277 breeze circulation in eastern Amazonia: observations and modelling results,  
278 *Theor. Appl. Climatol.*, 78, 111–121, <https://doi.org/10.1007/s00704-004-0047-6>,  
279 2004.
